# Supplementary material for: Isoscape of precipitation amount-weighted annual mean tritium ( 3 H)activity from 1976 to 2017 for the Adriatic-Pannonian region
Source: Copernicus journal article supplement (doi:10.5194/essd-2019-244), 2020-02-19
Supplement: Supplementary file [file essd-2019-244-RC2-supplement.pdf]

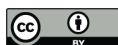

# Isoscape of precipitation amount-weighted annual mean tritium ( $^3\text{H}$ ) activity from 1976 to 2017 for the Adriatic-Pannonian region

Zoltán Kern<sup>1</sup>, István Gábor Hatvani<sup>1\*</sup>, Dániel Erdélyi<sup>1,2</sup>, Polona Vreča<sup>3</sup>, Ines Krajcar Bronić<sup>4</sup>, Tjaša Kanduč<sup>3</sup>, Marko Štrok<sup>3</sup>, István Fórizs<sup>1</sup>, László Palcsu<sup>5</sup>, György Czuppon<sup>1,5</sup> and Balázs Kohán<sup>6</sup>

5 <sup>1</sup>Institute for Geological and Geochemical Research, Research Centre for Astronomy and Earth Sciences, MTA Centre for Excellence, Budaörsi út 45, H-1112 Budapest, Hungary

<sup>2</sup>Centre for Environmental Sciences, Eötvös Loránd University, Pázmány Péter stny. 1/A, H-1117, Budapest, Hungary

<sup>3</sup>Department of Environmental Sciences, Jožef Stefan Institute, Ljubljana, Slovenia

<sup>4</sup>Department of Experimental Physics, Ruđer Bošković Institute, Bijenička 54, 10000 Zagreb, Croatia

10 <sup>5</sup>Isotope Climatology and Environmental Research Centre (ICER), Institute for Nuclear Research, Bem tér 18/c, Debrecen, Hungary

<sup>6</sup>Dept. of Environmental and Landscape Geography, Eötvös University, Pázmány stny 1/C, H-1117, Budapest, Hungary

\*Correspondence to: István Gábor Hatvani ([hatvaniig@gmail.com](mailto:hatvaniig@gmail.com))

15 **Abstract.** Tritium ( $^3\text{H}$ ) as a constituent of the water molecule is an important natural tracer in hydrological sciences. The anthropogenic tritium introduced into the atmosphere became unintentionally an excellent tracer of processes on the time scale of up to a 100 years. A prerequisite for tritium applications is to know the distribution of tritium activity in precipitation. Here we present the spatially continuous gridded database (isoscapes) for amount-weighted annual mean tritium activity in precipitation for the period 1976 to 2017 on  $1\times 1$  km grids for the Adriatic-Pannonian Region (using 39 stations), with a special  
20 focus on post-2010 years which are not represented by existing global models. Three stations were used to check the model performance independently confirming its capability to reproducing the spatiotemporal tritium variability in the region. This ‘Regional model’ is capable of providing reliable spatiotemporal input data for hydrogeological application at any place within Slovenia, Hungary and its surroundings. Results also show a decrease in the average spatial representativity of the stations regarding tritium activity in precipitation from ~600 km in 1970s when bomb-tritium was still prevailing in precipitation, to  
25 ~300 km in the 2010s. The post-2010 isoscapes can serve as benchmarks for background tritium activity for the region, helping to determine local increases of technogenic tritium from these backgrounds. The gridded tritium isoscape is available in NetCDF-4 at doi: [10.1594/PANGAEA.896938](https://doi.org/10.1594/PANGAEA.896938) (Kern et al., 2019).

Keywords: precipitation, Hungary, Slovenia, geospatial tritium model, tritium isoscape

30

## 1. Introduction



Tritium ( $^3\text{H}$ ) is a radioactive isotope of hydrogen (Alvarez and Cornog, 1939) with a half-life of 12.32 years ( $4500 \pm 8$  days, (Lucas and Unterweger, 2000)). Natural tritium is formed mainly by spallation reactions of protons and neutrons of primary and secondary cosmic radiation with atmospheric nuclei, mainly by the interaction of fast neutrons with atmospheric nitrogen (Lal and Peters, 1967). Tritium emission by thermonuclear tests between the 1950s and 1980 enormously exceeded the natural production (Araguas-Araguas et al., 1996; Palcsu et al., 2018). Since that time, tritium emission to the atmosphere from anthropogenic sources (e.g. nuclear industry, medical applications) corresponds to ~10% of the natural production and influences  $^3\text{H}$  content in precipitation mainly at local to regional scales (Araguas-Araguas et al., 1996). Starting from the 1980s, the technogenic tritium became the prevailing anthropogenic atmospheric tritium input signal over the bomb tritium in Central Europe (Hebert, 1990).

Tritium is introduced into the hydrological cycle following oxidation to tritiated water ( $^3\text{H}^1\text{HO}$ ). Tritium is an excellent tracer for determining time scales for the mixing and flow of waters, and is ideal for studying processes that occur on a time scale of less than 100 years (Kendall and McDonnell, 2012). It proved to be a powerful tool in various applications in hydrological researches (Jasechko, 2019) such as estimating mean residence time for surface water and groundwater (Michel, 1992; Stewart and Morgenstern, 2016; Zuber et al., 2001); dating cave drip waters (Kluge et al., 2010); understanding water circulation/mixing in geothermal (Ansari et al., 2017; Chatterjee et al., 2019) or permafrost settings (Gibson et al., 2016).

A prerequisite for such applications is either a measured or modelled reference of precipitation tritium activity (Stewart and Morgenstern, 2016). Long-term measurements for precipitation tritium activity are worldwide rare, and even the longest time series are usually intermitted by gaps. In the absence of on-site measurements, either remote monitoring data have to be used as references (Huang and Pang, 2010; Thatcher et al., 1961), or estimations are required. There are several methods to reconstruct precipitation tritium time series for geographical locations (Li et al., 2019). The prediction of the first global model for tritium distribution in precipitation from 1960 to 1986 (Doney et al., 1992) was improved and provided a higher accuracy estimate for precipitation  $^3\text{H}$  variations (Zhang et al., 2011) extending up to 2005 called, ‘Modified global model of tritium in precipitation (MGMTP)’. Unfortunately, the key parameters of MGMTP only available as isoline maps (Zhang et al., 2011), from which the model’s coefficients can be extracted with high uncertainty in a manual way, which leads them to be ambiguous. In addition, the quality of the estimated precipitation tritium activity values by MGMTP after 1990 become quite poor (Zhang et al., 2011); for instance in the studied region it produced uninterpretable, negative values (Sect. 4). The most recent global model for precipitation tritium activity covering the period 1955-2010 (Jasechko and Taylor, 2015), used inverse distance weighting for interpolation and its output is available in gridded format. However, this is based only on precipitation  $^3\text{H}$  activity concentration records of the stations of the Global Network of Isotopes in Precipitation (Rozanski et al., 1991) and it does not represent the most recent decade.

Although, global models are available, due to the differences in tritium activities around the globe, it is beneficial to define local precipitation  $^3\text{H}$  input curves (Stewart and Morgenstern, 2016). In the northern part of the Balkan region, for instance, it was shown that  $^3\text{H}$  content in precipitation deviated considerably after 1980 from the Vienna record (Miljevića et al., 1992) which is popularly used as remote reference station in hydrological modeling/calculations in the Adriatic-Pannonian region.



The quality of such curves is vital for the reliability of a hydrological model outputs when employed as input signal/data in hydrological modeling/calculations (Koeniger et al., 2008; Miljevića et al., 1992). Indeed, it has recently been found that the (in)accuracy of the used precipitation tritium time series is the key uncertainty factor for groundwater recharge estimations (Li et al., 2019).

70 Measurements of precipitation tritium activity in the Adriatic-Pannonian region began in Vienna Hohe Warte in 1961, which is the longest continuously operating station in the world, and in Central Europe (IAEA, 2016). Additional stations started operation in the past ~50 years with frequent interruption in data collection (Araguas-Araguas et al., 1996; Krajcar Bronić et al., 1998; Rozanski et al., 1991; Vreča et al., 2008). The demand in long-term tritium reference time-series in various hydrological/hydrogeological applications across the Adriatic-Pannonian region called forth the use of remote stations (e.g. Gessert et al. (2019); Kanduč et al. (2014); Kanduč et al. (2012)) and/or motivated the derivation of case specific “composite” tritium reference curves, e.g. Krajcar Bronić et al. (1992); Ozyurt et al. (2014); Szucs et al. (2015).

**The aim of this study** was to create a spatially continuous gridded database for tritium (isoscape) in precipitation across the Adriatic-Pannonian Realm for the decades around the turn of the 21st century with a special focus on the post-2010 which is not covered by the existing global models.

80

## 2. Materials and Methods

### 2.1. Used $^3\text{H}$ and precipitation data

An initial dataset was collected with 8053 monthly precipitation tritium activity values from 45 stations (GNIP ((IAEA, 2016)), ANIP (Kralik et al., 2003), (Krajcar Bronić et al., 2020; Palcsu et al., 2018; Vreča et al., 2006; Vreča et al., 2015; Vreča et al., 2014; Vreča et al., 2008) current project) covering the period from Jan 1961 to Dec 2017. To maximize the spatiotemporal density of the data set not only the Adriatic-Pannonian region, but the bordering areas were included in the analyses as well. The availability of  $^3\text{H}$  data varied in the investigated time period. Three time horizons were outlined with a relatively high abundance of data: early 1980s (number of annual data ( $n_a$ ) $\approx$ 15), early 2000s ( $n_a \approx$ 14) and the early 2010s ( $n_a \approx$ 21) (Fig. 1a). Until 1973 tritium activity data was only available from Austria. Monitoring of isotopes in precipitation on a larger scale in the region began in the mid-1970s in Belgrade (RS), Zagreb (HR) and Budapest (HU) as well. Following the initiation of these measurements becomes the network suitable - specifically from 1976 - for the spatiotemporal analysis of the large-scale variability of precipitation tritium activity in the region. Between 2003 and 2005, the number of stations dropped ( $<$ 9, Fig. 1a) due to a halt in the data collection of the Austrian stations. This was the lowest number of active stations in the investigated period. For the purpose of further calculations, the geographical coordinates of the stations were converted from latitude and longitude (EPSG: 4326, WGS84 projection) to metric coordinate system (EPSG:3857, WGS 84 / Pseudo-Mercator projection), since interpolation (variography see Sect. 2.3) has to be done on a metric scale.

90



100

To be able to derive amount weighted annual tritium activity averages, ( $0.5^\circ \times 0.5^\circ$ ) monthly precipitation amounts were used from the GPCC database (Becker et al., 2013), derived as precipitation anomalies at stations interpolated and then superimposed on the GPCC Climatology V2011 (Meyer-Christoffer et al., 2011).

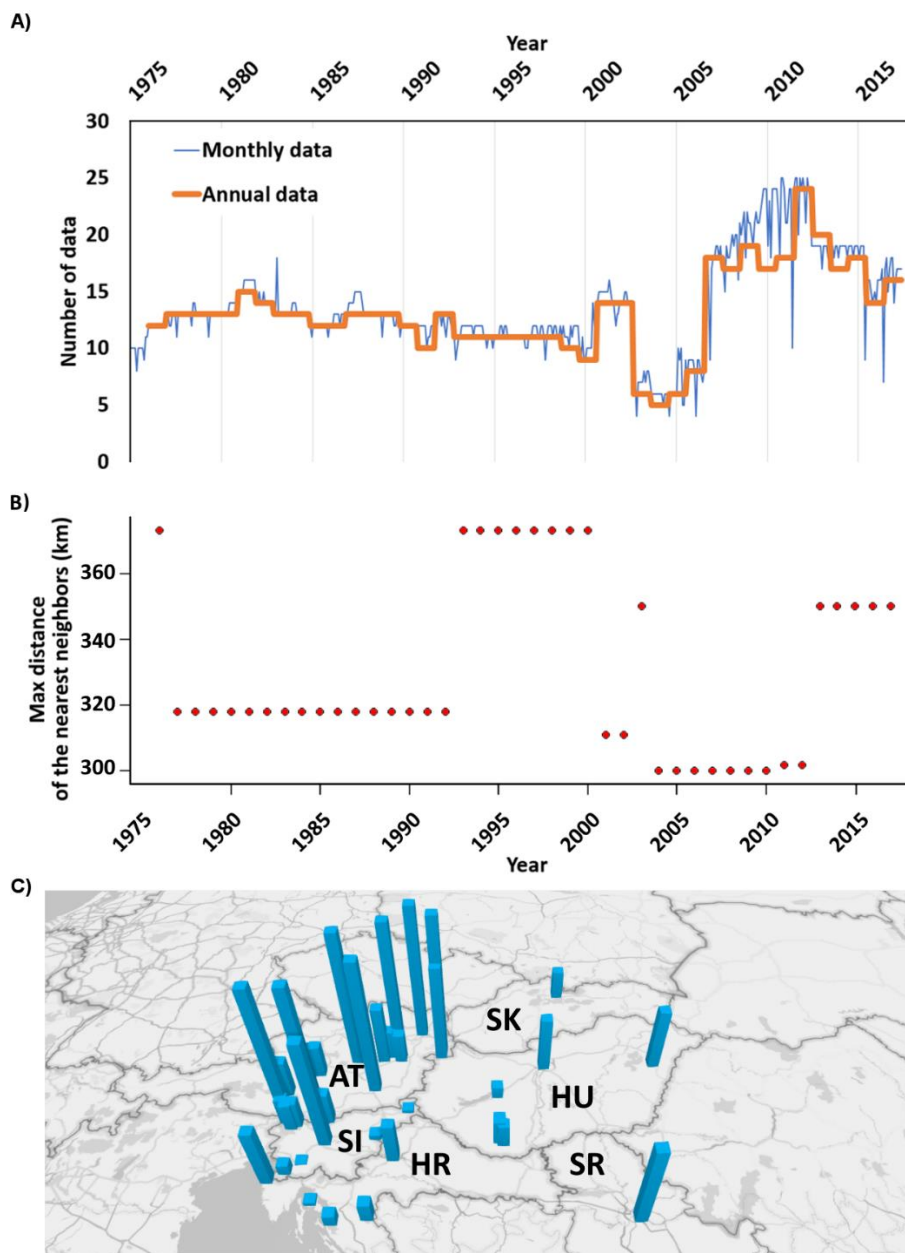

**Figure 1:** Temporal and spatial characteristics of the dataset. Number of data from precipitation stations producing measurements of  $^3\text{H}$  (1975-2017) A). The thick orange line represents the number of stations applicable for computing precipitation amount weighted annual

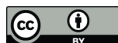

105 averages later used in the interpolation (1976-2017). The largest distance between the neighboring active stations of the studied  $^3\text{H}$  network in each year for 1976-2017 B). The spatial distribution of the monitoring sites C), where the height of the blue columns is proportional to the number of monthly data available between 1976 and 2017 at a given station; max=479 data at Podersdorf Austria. The country codes follow the ISO-3166-1 ALPHA-2. The basemap was taken from Bing maps, HERE Technologies 2019; accessed on 27.09.2019.

## 2.2. Data preprocessing

110 A sequential univariate outlier detection procedure (Ben-Gal, 2005) was applied to the data to find possible outlying values, which deviate to a high extent from the other observations (Barnett and Lewis, 1974; Hawkins, 1980). During the procedure, the time series of the stations were pairwise compared for each year. The approach is similar to the relative homogeneity test applied to meteorological data, in which e.g. a candidate station's time series is compared to its neighboring stations'; e.g. (Alexandersson, 1986; Lindau and Venema, 2019; Sugahara et al., 2012).

115 To avoid comparing a station with all the others from the network, including distant ones recording different environmental conditions (e.g. Alpine region vs. Great Hungarian Plain), the comparison was done only within a given search radius. The network was screened for each station's distance to its nearest neighbor for each year. Then out of all the years, the most frequently occurring largest nearest neighbor (~320 km) was chosen (Fig. 1b) to serve as the search radius for the sequential univariate outlier detection. There were 15 years when a station did not have a pair to compare it with. In 1976, 1993-2000  
120 and 2003 it was Belgrade-, while between 2013 and 2017 it was Debrecen due to their relatively isolated location from the others in the network. These are the southeasternmost and northeasternmost stations (Fig. 1c).

Pairwise differences of  $^3\text{H}$  data in monthly steps were calculated for each station with its neighbors within the ~320 km search radius. These pairwise differences were then averaged per month and the values belonging to the same calendar year were handled together. Due to the decrease in atmospheric concentration in tritium (Palcsu et al., 2018; Rozanski et al., 1991), the  
125 difference values were not comparable between the years, so the outliers were identified annually. The monthly average difference values were annually standardized.

It was found that the standardized mean differences were mostly within the  $\pm 1$  interval (82 %; Fig. 2) suggesting the usually small difference between neighboring records. In rare occasions (n=6 occurrences; 0.09%) the difference value was outside the  $\pm 7$  interval. These deviations were considered as threshold, determining the set of possibly erroneous data (outlier (Ben-  
130 Gal, 2005)), which were investigated one-by-one, if possible by consulting the data providers. For example, in Dec 1994 at Zagreb, the standardized differences indicated a possible error (d= -9.33), which coincided with experimental research in the nearby facility in which technogenic tritium was used (Krajcar Bronić et al., 2020), thus the sample was excluded from the analysis (Fig. 2).

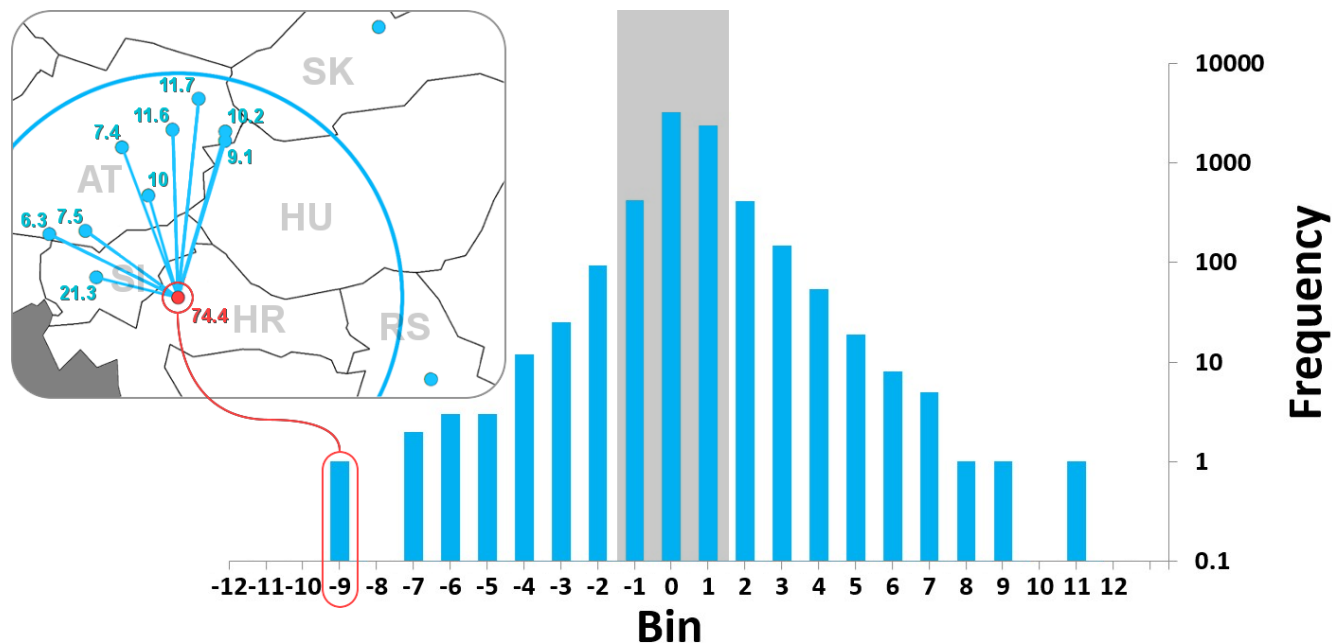

135

**Figure 2:** Histogram representing the distribution of the standardized difference values between the precipitation stations within a ~320 km search radius (1976–2017). The grey shaded background highlights the  $\pm 1$  standardized difference interval. The standardized difference of -9 (in a red rectangle) corresponds to an outlier measured at Zagreb (Dec 1994); it is shown on the inset map along with the  $^3\text{H}$  records from its neighbors within the search radius. For further details see text.

140

Annual amount-weighted means were only calculated if at least 85% of the fallen precipitation was analyzed for  $^3\text{H}$ . If more than 15% of the fallen precipitation was not analyzed for  $^3\text{H}$ , the year in question will be referred to as an “incomplete year”. This required completeness is stricter criterion than the GNIP protocol (70%; IAEA, 1992). These amount-weighted annual averages served as the input values for deriving the isoscapes with variography.

145

A robust hemispheric-scale pattern is a poleward increasing trend of precipitation  $^3\text{H}$  (Rozanski et al., 1991). Regression analysis between geographical latitude (using the metric coordinates in EPSG:3857) and amount weighted-annual precipitation  $^3\text{H}$  activity concentration mostly yielded insignificant linear relationships or contradictory to what was expected (i.e. poleward decreasing values e.g. 1987). The limited latitudinal extent of the study area (5) might explain the failure to detect the expected relationship. However, due to the lack of a clear spatial trend statistical trend removal was not conducted on the amount-weighted annual mean  $^3\text{H}$  activities instead they were used for regional isoscape modeling.

150

### 2.3. Derivation of precipitation amount-weighted annual mean tritium activity isoscapes

Semivariograms (Webster and Oliver, 2008) were used as the weighting function in kriging (Cressie, 1990) to explore the spatial variance of precipitation amount-weighted annual mean  $^3\text{H}$  activity for the stations of the Adriatic-Pannonian region.



155 The empirical semivariogram may be calculated using the Matheron algorithm (Matheron, 1965), where  $\gamma(h)$  is the semivariogram and  $Z(x)$  and  $Z(x+h)$  are the values of a parameter sampled at a planar distance  $|h|$  from each other

$$\gamma(h) = \frac{1}{2N(h)} \sum_{i=1}^{N(h)} [Z(x_i) - Z(x_i + h)]^2 \quad (1)$$

$N(h)$  is the number of lag- $h$  differences, i.e.  $n \times (n-1)/2$  and  $n$  corresponds to the number of sampling locations at a distance  $h$ .  
160 The most important properties of the semivariogram are the nugget, quantifying the variance at the sampling location (including information regarding the error of the sampling), the sill that is, the level at which the variogram stabilizes, which is the sum of the nugget ( $c_0$ ) and the reduced sill ( $c$ ), and the range ( $a$ ), which is the distance within which the samples have an influence on each other and beyond which they are uncorrelated (Chilès and Delfiner, 2012). If the semivariogram does not  
165 obtained. In this case, the sampling frequency is insufficient to estimate the sampling range using variography (Hatvani et al., 2017).

For geostatistical modeling (e.g. kriging), theoretical semivariograms have to be used to approximate the empirical ones (Cressie, 1990). Gaussian semivariograms were obtained with a maximum lag distance of 400 km and 11 uniform bins (steps)  
170 distance within which the samples have an influence on each other and beyond which they are uncorrelated (Chilès and Delfiner, 2012) were determined and used to evaluate the spatial representativity of the network. The reported ranges in the study area are planar distances in km; conversion to geodetic distance in the region:  $d_{\text{planar}} \times 0.678 \approx d_{\text{geodetic}}$ .

In a preliminary screening it was found that semivariograms had to have at least 3 station pairs in the first bin and more than 14 pairs in the first 3 bins to be applicable for interpolation; these were the minimum requirements for kriging. Semivariograms  
175 perfectly applicable for interpolation were obtained from years 1977, 1982, 2007, 2010, 2011 and 2012. The number of active stations in these years varied between 13 and 24. These years were further on used as the *reference years*. The years with a reduced number of available stations (Fig. 1a) produced semivariograms not applicable for kriging (for technical explanation see Appendix 1), because the data were sporadically spread in space and/or none of the stations provided continuous measurements in time.

180 Both types of data gaps can be classified as missing at random (MAR) (Little and Rubin, 2002). Because most modern data-imputation-methods start by assuming the missing data is MAR, imputation tools could have been applied in years with insufficient data density for proper interpolation. However, in every case, no method can provide an 'automatic' solution to the problem of missing data, and any approach must be used with caution considering the context of the problem (Kenward and Carpenter, 2007); for instance, the accuracy of the imputed value will not be optimal and the spatial correlation and intra-  
185 variable relationships will be corrupted (Barnett and Deutsch, 2015).



Thus, in these – so called - “intermediate” years, the semivariogram of the reference years having the most overlap with regard to its station distribution, was used as the weight for kriging. To do so, it was investigated for each intermediate year, how many sites are commonly active in its temporally neighboring reference year. The following requirements were also considered:

- 190       •       the maximum number of sites active in a given intermediate year which are not active in the reference year can be 3
- if the difference in the number of active stations between an intermediate year and the “neighboring” two reference years is the same, then the semivariogram of the reference year with the greater number of active stations was used rendering that variogram more robust,
- 195       •       and the one closest to the intermediate year in time.

Finally, 42 stations were considered for further evaluation out of which 39 stations were used for tritium isoscape derivation while three were excluded from interpolation and used to test the performance of the interpolated products (Table 1): Zgornja Radovna (active: 2010-2017) from Slovenia, Siófok (active: 2013-2016) from Hungary, and Malinska (active: 2000-2001) from Croatia (IAEA, 1992).

200 All computations were performed using Golden Software Surfer 15, ArcGIS 10, R (R Core Team, 2019) GS+ 10. For certain visualizations of the results, Gimp 2.8 and MS Excel 365 were used.

**Table 1:** Sampling sites with basic geographical information used in the study arranged by country alphabetically. The stations below the dashed line were used for model performance testing; for details see Sect. 4.

| Name             | Latitude | Longitude | Elevation | Country | No. of monthly data (1976-2017) |
|------------------|----------|-----------|-----------|---------|---------------------------------|
| Apetlon          | 47.741   | 16.831    | 119       | AT      | 321                             |
| Bad Aussee       | 47.600   | 13.783    | 640       | AT      | 15                              |
| Eisenkappl       | 46.489   | 14.584    | 550       | AT      | 106                             |
| Gloggnitz        | 47.675   | 15.943    | 440       | AT      | 96                              |
| Göbl             | 47.640   | 13.901    | 710       | AT      | 59                              |
| Graz Universität | 47.078   | 15.450    | 366       | AT      | 447                             |
| Gutenstein       | 47.875   | 15.886    | 475       | AT      | 447                             |
| Karlgraben       | 47.678   | 15.560    | 775       | AT      | 193                             |
| Klagenfurt       | 46.643   | 14.320    | 447       | AT      | 446                             |
| Lackenhof        | 47.870   | 15.142    | 882       | AT      | 51                              |
| Nasswald         | 47.764   | 15.688    | 774       | AT      | 95                              |
| Planneralm       | 47.403   | 14.200    | 1605      | AT      | 106                             |
| Podersdorf       | 47.855   | 16.835    | 120       | AT      | 467                             |





|                        |        |        |      |    |     |
|------------------------|--------|--------|------|----|-----|
| St. Peter im Katschtal | 47.027 | 13.596 | 1220 | AT | 121 |
| Villacher Alpe         | 46.603 | 13.672 | 2164 | AT | 451 |
| Wien Hohe Warte        | 48.249 | 16.356 | 203  | AT | 444 |
| Wildalpen              | 47.664 | 14.978 | 610  | AT | 447 |
| Zistersdorf            | 48.544 | 16.750 | 201  | AT | 88  |
| Plitvice               | 44.881 | 15.619 | 580  | HR | 65  |
| Zagreb <sup>1</sup>    | 45.817 | 15.983 | 157  | HR | 133 |
| Zavižan                | 44.815 | 14.976 | 1594 | HR | 39  |
| Budapest               | 47.464 | 19.073 | 101  | HU | 181 |
| Debrecen               | 47.475 | 21.494 | 110  | HU | 202 |
| Met-B                  | 46.070 | 18.111 | 177  | HU | 41  |
| Met-Boda               | 46.087 | 18.047 | 233  | HU | 82  |
| Met-Het                | 46.125 | 18.047 | 165  | HU | 82  |
| Met-II. üz             | 46.100 | 18.093 | 332  | HU | 27  |
| Met-V. üz              | 46.122 | 18.092 | 330  | HU | 58  |
| Met-Z                  | 46.037 | 18.125 | 117  | HU | 75  |
| Belgrade               | 44.783 | 20.533 | 243  | RS | 283 |
| Kozina                 | 45.604 | 13.932 | 486  | SI | 35  |
| Kredarica              | 46.379 | 13.849 | 2514 | SI | 91  |
| Ljubljana <sup>2</sup> | 46.095 | 14.597 | 282  | SI | 371 |
| Murska Sobota          | 46.652 | 16.191 | 186  | SI | 11  |
| Portorož               | 45.467 | 13.617 | 2    | SI | 196 |
| Postojna               | 45.766 | 14.198 | 533  | SI | 5   |
| Rateče                 | 46.497 | 13.713 | 864  | SI | 88  |
| Sv. Urban              | 46.184 | 15.591 | 283  | SI | 16  |
| Liptovský Mikuláš      | 49.098 | 19.590 | 570  | SK | 96  |
| -----                  |        |        |      |    |     |
| Siófok                 | 46.911 | 18.041 | 108  | HU | 39  |
| Malinska               | 45.121 | 14.526 | 1    | HR | 10  |
| Zgornja Radovna        | 46.428 | 13.943 | 750  | SI | 89  |

205 1: In the investigated period two stations were conducting measurements in Zagreb in a non-overlapping way (Krajcar Bronić et al., 2020)

2: In the investigated period three stations were conducting measurements in Ljubljana in a non-overlapping way (Vreča et al., 2014; Vreča et al., 2008)



### 3. Tritium isoscapes (1976-2017)

According to the obtained regional gridded precipitation amount-weighted annual mean  $^3\text{H}$  activity time series for the Adriatic-Pannonian region (referred to hereinafter as Regional model) the monitoring network provides a proper representativity of the study area (e.g. Fig. 3, in-set maps).

The most striking long-term temporal pattern (decrease in precipitation  $^3\text{H}$  activity; Fig. 3) prevailing in the whole region seen from the isoscapes is also reflected in time series of distant locations (Fig. 4). Moreover, the distinctive interannual fluctuation of amount-weighted annual mean  $^3\text{H}$  activity at Budapest and Ljubljana (Fig. 4) also indicate that the Regional model produced differing sub-regional variability over the modelled time. For instance, the maxima of the modelled precipitation  $^3\text{H}$  activity occurs in 1979 and 1976, while a local minima from the early '90s in 1990 and 1991 at Budapest (Fig. 4a) and Ljubljana (Fig. 4b) are observed, respectively.

Although no significant relationship was documented between latitude and/or continentality, still increasing precipitation  $^3\text{H}$  activity was observable inland with the lowest values documented along the Slovenian and northern Croatian coast in all years (see e.g. 2010; Fig. 3). This pattern can be related to the generally observed lower activity at maritime coastal stations due to the higher contribution of primary marine evaporation practically free from  $^3\text{H}$  (Eastoe et al., 2012; Rozanski et al., 1991; Vreča et al., 2006) and higher contribution of recycled modern meteoric water over the continent. For instance, moisture originating from continental Europe and the Atlantic Ocean was found to be distinct regarding tritium concentrations (8.8 TU and  $\sim 0$  TU, respectively) (Juhlke et al., 2019).

Results show a decrease in the spatial autocorrelation of tritium activity concentration of precipitation from the 1970s to the 2010s (Fig. 3):  $\sim 600$  km in the 1970s,  $\sim 450$  km in the 1980s, to  $\sim 300$  km in the 2010s. This period (1970-2010) was characterized by the removal of bomb-tritium from the atmosphere (Araguas-Araguas et al., 1996; Palcsu et al., 2018). The overwhelming activity of bomb-produced  $^3\text{H}$  was several orders of magnitude higher than the natural background (Rozanski et al., 1991), and largely masked the smaller-scale natural variability. During last 2-3 decades the tritium activity in precipitation has declined globally and regionally, approaching the natural pre-bomb level and the bomb-tritium is barely present in modern precipitation. Since, in the Adriatic Pannonian region, the  $^3\text{H}$  activity in precipitation approached natural levels by the early-1990s (Krajcar Bronić et al., 2020; Palcsu et al., 2018; Vreča et al., 2008), it can be expected that the  $\sim 300$  km range obtained for the 2010s reflects the range of similarity of natural  $^3\text{H}$  variability in the study area (SE Europe and E Central Europe). Regarding spatial coverage, the northwestern part of the region was much more represented in all years, due to the expected denser station network along the Austrian border with Slovenia and Hungary (Fig. 1c; Fig 3).

240

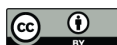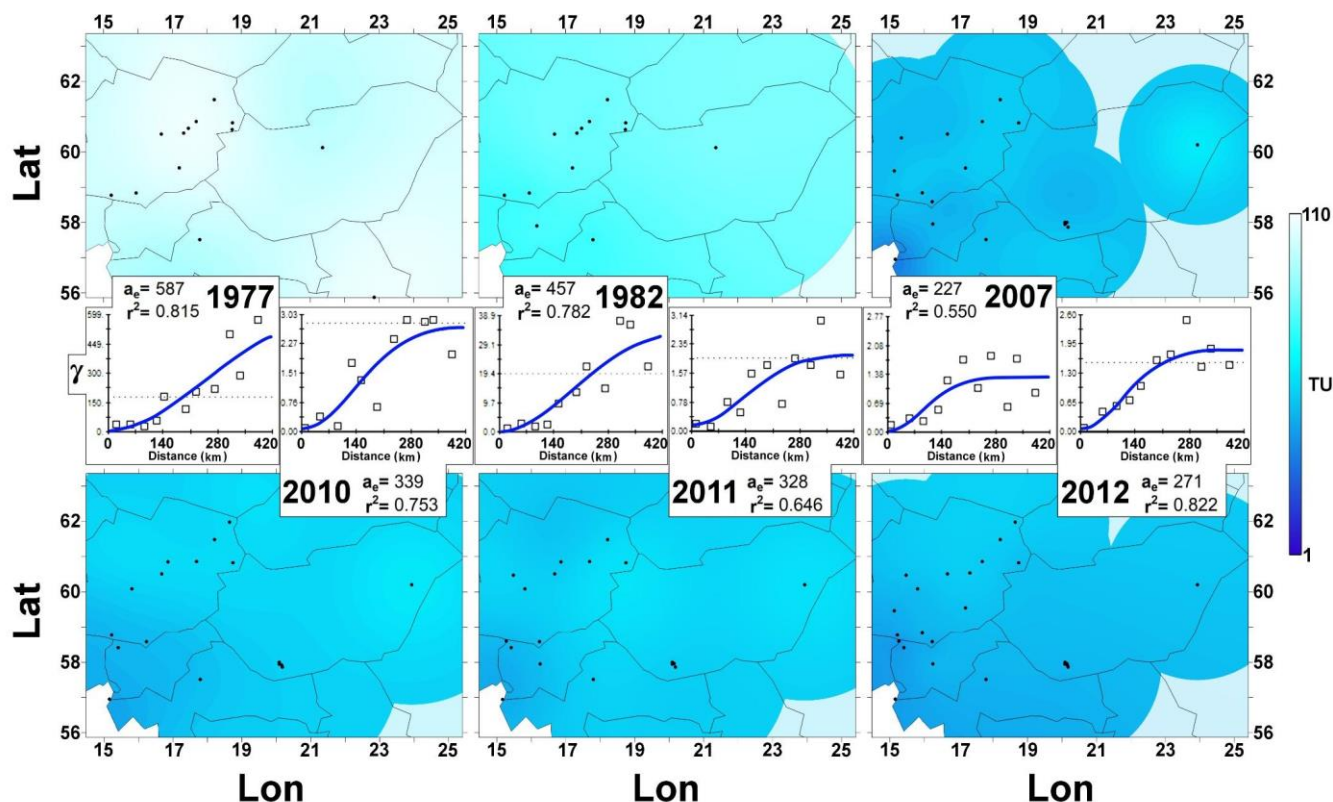

**Figure 3:** Isoscapes of  $^3\text{H}$  activity (TU) and semivariograms for the reference years (upper panels: 1977, 1982, 2007; lower panels: 2010, 2011, 2012) in the Adriatic-Pannonian Region. The areas outside the union of the range ellipses of a given year are dimmed and the Adriatic Sea marked in white. Isoscape grid resolution:  $1 \times 1$  km. Easting and northing in  $10^5$  km. The inset figures show the empirical- (empty black squares) and theoretical semivariograms (blue line) used for kriging along with the obtained effective ranges ( $a_e$  planar distances in km) and the fit ( $r^2$ ) of the theoretical semivariograms. The dotted horizontal line indicates the average variance.

#### 4. Verification of goodness of interpolation

Two of the longest records from both Slovenia (Ljubljana) and Hungary (Budapest) illustrate the performance of the estimations and their potential in mitigating lack of data. Budapest- and Ljubljana  $^3\text{H}$  records - used both in the variograms of the “anchor years” and in the interpolation - were compared to the interpolated product’s time series of the nearest grid cell (Fig. 4). In the years when the measured values were used in interpolation, there is an expected perfect match between the measured and modelled values. It becomes clear that the estimated records are more than capable in filling the gaps of the measured time series, when there were no measurements (e.g. Ljubljana: 1985 and 1996; Fig. 4b) or in the case of “incomplete years”, when the ratio of fallen precipitation not analyzed for  $^3\text{H}$  in a given year was  $>15\%$  (e.g. Budapest: 1987 and 1991, Fig. 4a; Ljubljana: 1986, 1997-1998, 2000 and 2010, Fig. 4b). In these particular years, when the measured  $^3\text{H}$  values were



not used for interpolation, the modelled values seem more capable of reproducing the actual  $^3\text{H}$  variability using the neighboring stations' than from the fragmented  $^3\text{H}$  data of the incomplete year.

The average differences between the Regional model and measured values were  $-0.03\text{TU}$  for Budapest, and  $1.13\text{TU}$  for Ljubljana, excluding the years with not enough precipitation represented. In the meanwhile, the average difference in the so-called incomplete years was  $\sim 17$  to  $0\text{ TU}$  for Budapest and Ljubljana, with a general tendency of obtaining higher differences with a higher ratio of precipitation not represented by tritium measurements. It is noteworthy, that although the short-term intradecadal variability of atmospheric tritium is different at the two sites, their long-term decrease concurs even at a  $\sim 400\text{ km}$  distance, again indicating the goodness of the interpolation.

The presented Regional model of tritium activity was compared with the spatially corresponding output of both currently available global precipitation tritium isoscapes: the Modified global model of tritium in precipitation (MGMTP (Zhang et al., 2011)) and the Global inverse distance weighted model (GIDW) at Budapest (Fig. 4a) and Ljubljana (Fig. 4b). Between 1975 and 1980 the Regional model's and the MGMTP's estimates are very similar and resemble the actual weighted annual mean precipitation  $^3\text{H}$  at Budapest. However, only at Ljubljana is the MGMTP capable of steadily reproducing the actual measurements until the late-1990. Afterwards, it indicates solely negative values, which are uninterpretable, just as most of the MGMTP predicted values at Budapest after 1980. In the meanwhile, the Regional model gave much more accurate and reliable results (Fig. 4) as discussed above. Note here, that the weak estimation of the MGMTP can be attributed to the difficulties in reading the precipitation tritium activity values from the only available output (isoline map) of the model and the undocumented factors of the model in given years.

The GIDW (Jasechko and Taylor, 2015) model was capable of reproducing the measured precipitation tritium values much more accurately at all locations than the MGMTP (Fig. 4). Nevertheless, the GIDW model produced a striking overestimation at the beginning of the modelled period, for example, in 1977, when the measured values at Budapest were overestimated by  $>20\text{ TU}$  (Fig. 4a). On the contrary, the GIDW model underestimated the actual values from 1981 to 1991, except for one year (Fig. 4a). It should be noted, that the Regional model gave an even better regional estimate, then either of the global models.

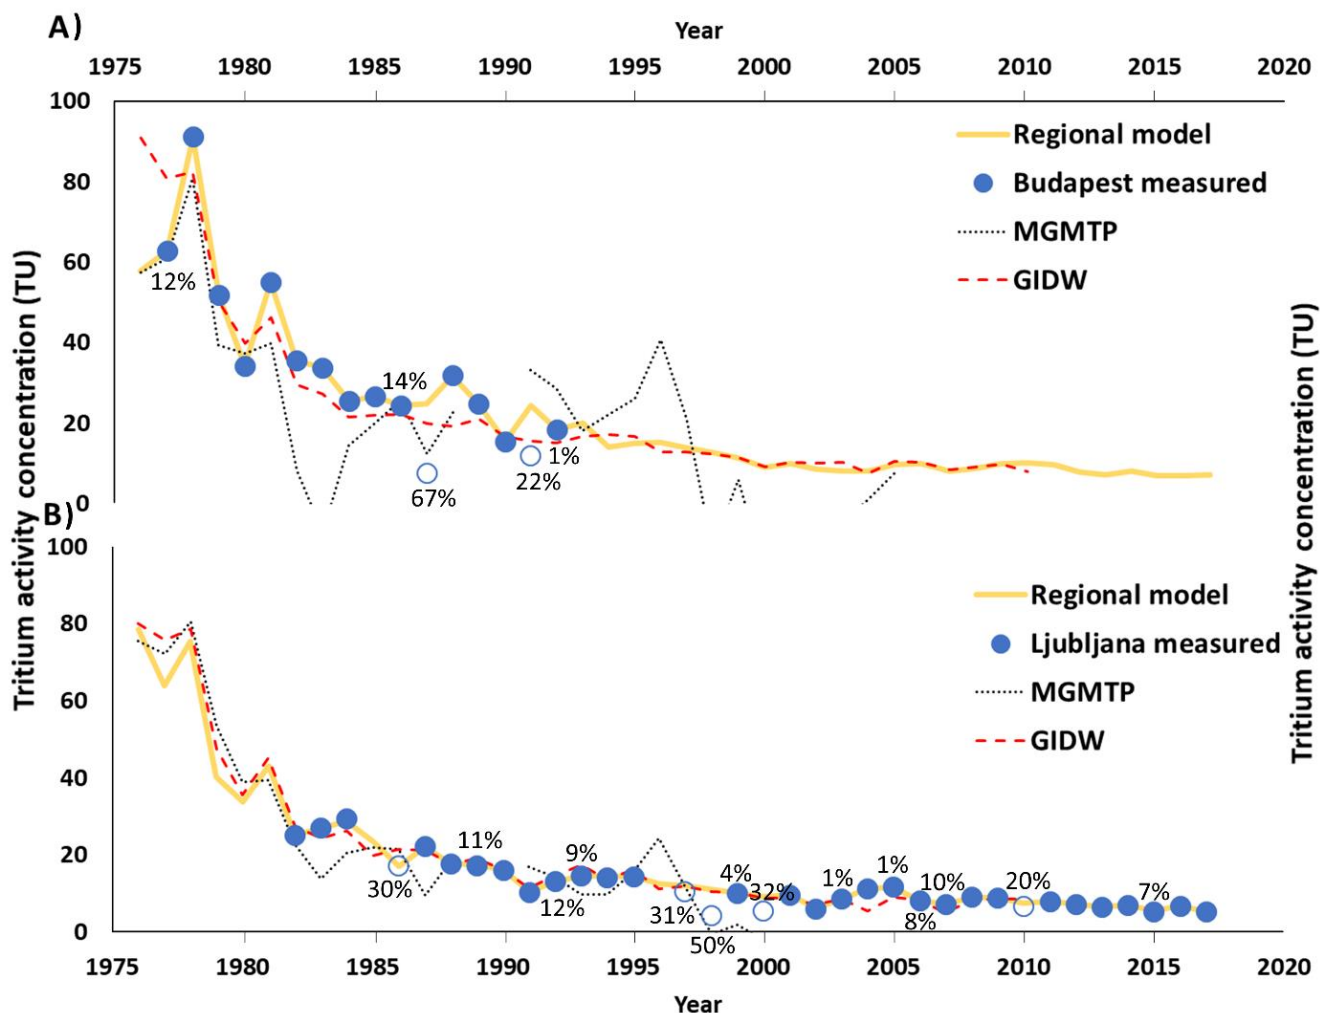

**Figure 4:** Measured and estimated  $^3\text{H}$  values at Budapest, Hungary (A) and Ljubljana, Slovenia (B) between 1976 and 2017. The black dotted lines indicate the estimations of the ‘modified global model of tritium in precipitation’ (MGMTP; (Zhang et al., 2011)) and the red dashed ones indicate the Global inverse distance weighted model (GIDW). Note here that uninterpretable negative estimates of MGMTP were not shown. The percentages next to the modelled values indicate the ratio of fallen precipitation not analyzed for  $^3\text{H}$  in a given year, if it was  $>0\%$ . The empty circles indicate an “incomplete year” in which the given  $^3\text{H}$  value was not used for interpolation.

As an additional out-of-sample verification, the measured precipitation tritium records at stations Zgornja Radovna (2010-2017), Siófok (2013-2016) and Malinska (Dec 2000 and 2001) were compared to the Regional model’s estimated  $^3\text{H}$  time series of the grid closest to the stations. The average annual difference between the modelled and measured values was 3.8 TU in 2001 at Malinska (Fig. 5a), 0.1 TU at Zgornja Radovna (Fig. 5b) and -1.7 TU at Siófok stations (Fig. 5c), while the st. dev. of the differences was 0.3 and 1.6 TU for Zgornja Radovna and Siófok respectively. The Regional model estimated annual



amount-weighted  $^3\text{H}$  activity at Zgornja Radovna very accurately, while the somewhat higher difference at Siófok could be explained by the closeness of the largest **shallow** freshwater lake in Central Europe, Lake Balaton (Hatvani et al., 2014). The mean residence time in the largest basin of the lake, Siófok Basin, was estimated to be between 2 and 6 yrs in the 1990s (Istvánovics et al., 2002), which presumably in the same range in the 2010s as well. Keeping in mind the gradual decrease of  $^3\text{H}$  in meteoric waters (in the region e.g. Fig. 4), the evaporation from this ‘aged’ reservoir can provide an isotopically detectable contribution to the atmospheric moisture measured at Siófok station, resulting in higher tritium activity values than the modelled ones (Fig. 5c).

The high difference (+3.8 TU) between the Regional model and the measured values at Malinska can be attributed to the high portion of precipitation (20%) not having corresponding tritium measurements in either year. Moreover, at Malinska, the Regional model provided more reliable estimates than the MGMTP, which produced negative - thus meaningless - values in the period when direct measurements were available (Fig. 5a).

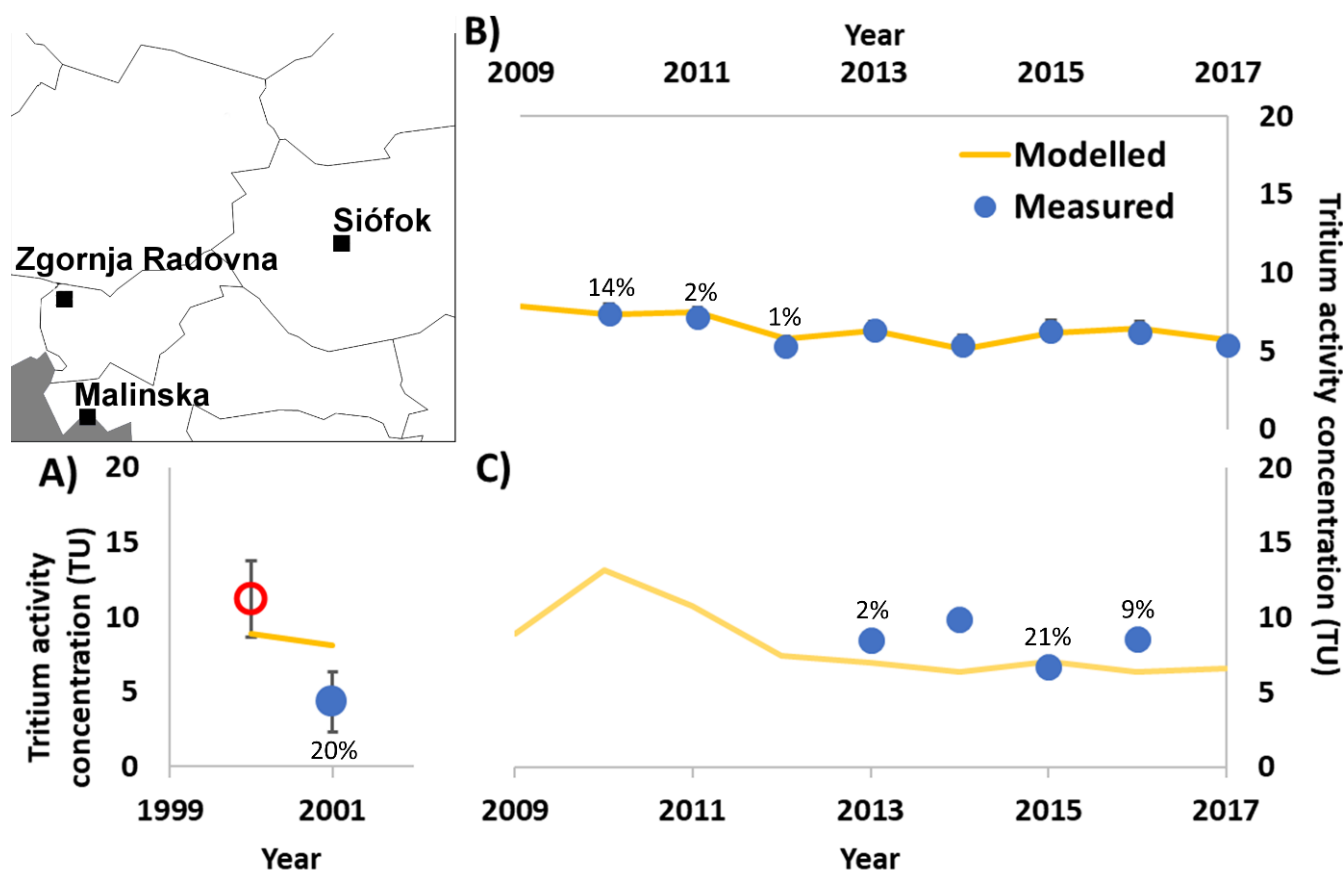

305 **Figure 5:** Tritium activity concentration values (measured and modelled by the Regional model) at stations Malinska (Krk Island) in 2000 and 2001 (A), Zgornja Radovna (B) and Siófok (C) between 2009 and 2017. The percentages next to the modelled values indicate the ratio of fallen precipitation not analyzed for  $^3\text{H}$  in a given year, if it was  $>0\%$ . The red empty circle indicates a single available monthly measured



310 value for December 2000. Error bars show measurement uncertainties, although it is smaller than the marker in B and C. The inset map shows the location of the sites used for out-of-sample verification.

## 5. Possibility of applications (outlook, conclusions)

Continuous long-term records of tritium in precipitation are scarcely available worldwide, thus estimations or modelling are necessary to exploit its potential in hydrological researches. In order to decrease the uncertainty of tritium activity in the hydrological models, the application of regional  $^3\text{H}$  models have to be increased, since these are more capable of producing accurate estimations than global ones (Stewart and Morgenstern, 2016).

320 Instead of using remote station data or ad hoc composite curves, site specific time-series retrieved from the presented Regional precipitation amount-weighted annual mean  $^3\text{H}$  isoscapes should be used. These isoscapes (Kern et al., 2019) can serve as a reference dataset for studies on infiltration dynamics, water transport through various compartments of the hydrological cycle, mixing processes, run-off modelling; e.g. to estimate mean residence time in surface waters and groundwater (Kanduč et al., 2014; Ozyurt et al., 2014; Szucs et al., 2015). As a specific type of hydrogeological application, the Regional model of  $^3\text{H}$  time-series will serve as a benchmark in estimating the mean infiltration age of dripwater (Kluge et al., 2010) which can provide an additional tool for ongoing cave monitoring studies from the region (e.g. Czuppon et al. (2018); Czuppon et al. (2013); Fehér et al. (2016); Surić et al. (2010)) in a spatiotemporally accurate way.

325 The higher precipitation  $^3\text{H}$  activity observed at a lakeshore station (Fig. 5c) reflects moisture recycling from the aged lake surface water via evaporation to the local precipitation. The observed deviation highlights the potential of the database to reveal sub-regional anomalous local sources in the hydrological cycle. As a special case the post-2010 isoscapes can serve as benchmarks for background tritium activity for the region, helping to determine local increases of technogenic tritium from these backgrounds.

330 Our Regional model was able to provide better estimates than either of the global models for the study area. Prior to 1975 we encourage the use of the GIDW model's estimations (Jasechko and Taylor, 2015) as a reference for studies dealing with precipitation tritium activity. The Regional model and the GIDW model should be spliced together at 1975 and can be used together in the need of a semi-centennial precipitation tritium activity dataset.

## 335 6. Data format and availability

The final product, the spatially continuous annual (1976-2017)  $1 \times 1$  km grids of precipitation amount-weighted annual mean tritium activity for the Adriatic-Pannonian Region is provided in a netCDF-4 (net-work common data form) format available at PANGAEA (<https://doi.pangaea.de/10.1594/PANGAEA.896938>) (Kern et al., 2019), compiled using the EPSG 3857 projection. A script written to be able to browse the dataset and convert the projection to EPGS 4326 is provided in the supplement.

340



## 7. Author contribution

ZK designed the experiments. PV, MŠ, TK, LP, GyC and IKB contributed data. IGH and DE developed the model code and performed the analyses. ZK, IGH, PV and DE prepared the manuscript with contributions from TK, MŠ, IF, and BK. The authors applied the SDC approach for the sequence of authors. See <https://doi.org/10.1371/journal.pbio.0050018> for further details. All authors took part in the manuscript preparation, and revision.

## 8. Competing interests:

The authors declare that they have no conflict of interest.

## 9. Acknowledgements

This work was supported by the National Research, Development and Innovation Office under Grants SNN118205, PD121387; Slovenian Research Agency ARRS under Grants: N1-0054, J4-8216 and P1-0143. The research was partly supported by the European Union and the State of Hungary, co-financed by the European Regional Development Fund in the project of GINOP-2.3.2-15-2016-00009 'ICER'. The authors thank to all the people who participated in precipitation sampling and measurements. This is contribution No. 66 of 2ka Palaeoclimatology Research Group.

## References

- Alexandersson, H.: A homogeneity test applied to precipitation data, *Journal of Climatology*, 6, 661-675, doi:10.1002/joc.3370060607, 1986.
- Alvarez, L. W. and Cornog, R.: Helium and Hydrogen of Mass 3, *Physical Review*, 56, 613-613, doi: 10.1103/PhysRev.56.613, 1939.
- Ansari, M. A., Sinha, U. K., Deodhar, A., Mendhekar, G. N., Kumar, M., Patbhaje, S. D., and Dash, A.: Evaluation of groundwater tritium content and mixing behavior of Tatapani geothermal systems, Chhattisgarh, India, *Journal of Radioanalytical and Nuclear Chemistry*, 313, 617-623, doi: 10.1007/s10967-017-5377-9, 2017.
- Araguas-Araguas, L., Danesi, P., Froehlich, K., and Rozanski, K.: Global monitoring of the isotopic composition of precipitation, *Journal of Radioanalytical and Nuclear Chemistry*, 205, 189-200, doi: 10.1007/BF02039404, 1996.
- Barnett, R. M. and Deutsch, C. V.: Multivariate Imputation of Unequally Sampled Geological Variables, *Mathematical Geosciences*, 47, 791-817, doi: 10.1007/s11004-014-9580-8, 2015.
- Barnett, V. and Lewis, T.: *Outliers in Statistical Data*, John Wiley and Sons, Chichester, 1974.
- Becker, A., Finger, P., Meyer-Christoffer, A., Rudolf, B., Schamm, K., Schneider, U., and Ziese, M.: A description of the global land-surface precipitation data products of the Global Precipitation Climatology Centre with sample applications including centennial (trend) analysis from 1901–present, *Earth Syst. Sci. Data*, 5, 71-99, doi: 10.5194/essd-5-71-2013, 2013.
- Ben-Gal, I.: Outlier Detection. In: *Data Mining and Knowledge Discovery Handbook*, Maimon, O. and Rokach, L. (Eds.), Springer US, Boston, MA, 2005.
- Chatterjee, S., Gusyev, M. A., Sinha, U. K., Mohokar, H. V., and Dash, A.: Understanding water circulation with tritium tracer in the Tural-Rajwadi geothermal area, India, *Applied Geochemistry*, 109, 104373, doi: <https://doi.org/10.1016/j.apgeochem.2019.104373>, 2019.





- 380 Chilès, J.-P. and Delfiner, P.: Geostatistics, Wiley, Canada, 2012.  
Cressie, N.: The origins of kriging, *Math Geol*, 22, 239-252, doi: 10.1007/BF00889887, 1990.  
Czuppon, G., Demény, A., Leél-Össy, S., Óvari, M., Molnár, M., Stieber, J., Kiss, K., Kármán, K., Surányi, G., and Haszpra, L.: Cave monitoring in the Béke and Baradla caves (Northeastern Hungary): implications for the conditions for the formation cave carbonates, *International Journal of Speleology*, 47, 13-28, 2018.
- 385 Czuppon, G., Kern, Z., Kármán, K., Németh, S., John, S., Haszpra, L., Kohán, B., Kiss, K., Siklósy, Z., and Polacsek, Z.: Spatial and temporal variations of dD and d18O values of cave drip waters: implications for paleoclimate signal in stalagmite, *Central European Geology* 56, 274-276, doi: 10.1556/CEuGeol.56.2013.2-3.1, 2013.  
Doney, S. C., Glover, D. M., and Jenkins, W. J.: A model function of the global bomb tritium distribution in precipitation, 1960–1986, *Journal of Geophysical Research: Oceans*, 97, 5481-5492, doi: 10.1029/92jc00015, 1992.
- 390 Eastoe, C. J., Watts, C. J., Ploughe, M., and Wright, W. E.: Future Use of Tritium in Mapping Pre-Bomb Groundwater Volumes, *Groundwater*, 50, 87-93, doi: 10.1111/j.1745-6584.2011.00806.x, 2012.  
Fehér, K., Kovács, J., Márkus, L., Borbás, E., Tanos, P., and Hatvani, I. G.: Analysis of drip water in an urban karst cave beneath the Hungarian capital (Budapest), *Acta Carsologica*, 45, 213-231, 2016.
- 395 Gessert, A., Straková, V., Palcsu, L., Koltai, G., Braun, M., Heim, E., and Czébely, A.: Differences in temporal changes of selected water quality parameters on Jasovská Planina Plateau (Slovak Karst, Slovakia), *GEOGRAPHIA CASSOVIENSIS XIII*, 1, 5-20, 2019.  
Gibson, J. J., Birks, S. J., and Yi, Y.: Higher tritium concentrations measured in permafrost thaw lakes in northern Alberta, *Hydrological Processes*, 30, 245-249, doi: 10.1002/hyp.10599, 2016.
- 400 Hatvani, I. G., Clement, A., Kovács, J., Kovács, I. S., and Korponai, J.: Assessing water-quality data: The relationship between the water quality amelioration of Lake Balaton and the construction of its mitigation wetland, *Journal of Great Lakes Research*, 40, 115-125, doi: <http://dx.doi.org/10.1016/j.jglr.2013.12.010>, 2014.  
Hatvani, I. G., Leuenberger, M., Kohán, B., and Kern, Z.: Geostatistical analysis and isoscape of ice core derived water stable isotope records in an Antarctic macro region, *Polar Science*, 13, 23-32, doi: <https://doi.org/10.1016/j.polar.2017.04.001>, 2017.
- 405 Hawkins, D. M.: Identification of Outliers, Springer Netherlands, Dordrecht, 1980.  
Hebert, D.: Technogenic Tritium in Central European Precipitations, *Isotopenpraxis Isotopes in Environmental and Health Studies*, 26, 592-595, doi: 10.1080/10256019008622441, 1990.  
Huang, T. and Pang, Z.: Changes in groundwater induced by water diversion in the Lower Tarim River, Xinjiang Uygur, NW China: Evidence from environmental isotopes and water chemistry, *Journal of Hydrology*, 387, 188-201, doi: <https://doi.org/10.1016/j.jhydrol.2010.04.007>, 2010.
- 410 IAEA: Global Network of Isotopes in Precipitation. The GNIP Database, [Http://www.Isohis.Iaea.Org](http://www.isohis.iaea.org), last access: 12.12.2015, 2016.  
IAEA: Statistical treatment of data on environmental isotopes in precipitation, International Atomic Energy Agency, Vienna, 1992.  
Istvánovics, V., Somlyódy, L., and Clement, A.: Cyanobacteria-mediated internal eutrophication in shallow Lake Balaton after load reduction, *Water Research*, 36, 3314-3322, doi: [https://doi.org/10.1016/S0043-1354\(02\)00036-2](https://doi.org/10.1016/S0043-1354(02)00036-2), 2002.
- 415 Jasechko, S.: Global Isotope Hydrogeology—Review, *Reviews of Geophysics*, 57, 835-965, doi: 10.1029/2018rg000627, 2019.  
Jasechko, S. and Taylor, R. G.: Intensive rainfall recharges tropical groundwaters, *Environmental Research Letters*, 10, 124015, doi: 10.1088/1748-9326/10/12/124015, 2015.
- 420 Juhlke, T. R., Sültenfuß, J., Huneau, F., Garel, E., Santoni, S., Barth, J. A. C., and van Geldern, R.: Tritium as hydrological tracer in Mediterranean precipitation events, *Atmos. Chem. Phys. Discuss.*, 2019, 1-22, doi: 10.5194/acp-2019-725, 2019.  
Kanduč, T., Grassa, F., McIntosh, J., Stibilj, V., Ulrich-Supovec, M., Supovec, I., and Jamnikar, S.: A geochemical and stable isotope investigation of groundwater/surface-water interactions in the Velenje Basin, Slovenia, *Hydrogeol J*, 22, 971-984, doi: 10.1007/s10040-014-1103-7, 2014.
- 425 Kanduč, T., Mori, N., Kocman, D., Stibilj, V., and Grassa, F.: Hydrogeochemistry of Alpine springs from North Slovenia: Insights from stable isotopes, *Chemical Geology*, 300-301, 40-54, doi: <https://doi.org/10.1016/j.chemgeo.2012.01.012>, 2012.  
Kendall, C. and McDonnell, J. J.: Isotope tracers in catchment hydrology, Elsevier, 2012.  
Kenward, M. G. and Carpenter, J.: Multiple imputation: current perspectives, *Statistical Methods in Medical Research*, 16, 199-218, doi: 10.1177/0962280206075304, 2007.

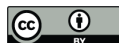

- 430 Kern, Z., Hatvani, I. G., Erdélyi, D., Mona, T., and Vreca, P.: Isoscape of precipitation weighted annual mean tritium activities across the Adriatic-Pannonian Region (1976-2017) last accessed 03 December 2019, <https://doi.pangaea.de/10.1594/PANGAEA.896938>, 2019.
- Kluge, T., Riechelmann, D. F. C., Wieser, M., Spötl, C., Sültenfuß, J., Schröder-Ritzrau, A., Niggemann, S., and Aeschbach-Hertig, W.: Dating cave drip water by tritium, *Journal of Hydrology*, 394, 396-406, doi: <https://doi.org/10.1016/j.jhydrol.2010.09.015>, 2010.
- 435 Koeniger, P., Schwientek, M., Uhlenbrook, S., Leibundgut, C., and Krause, W. J.: Tritium balance in macro-scale river basins analysed through distributed hydrological modelling, *Hydrological Processes*, 22, 567-576, doi: 10.1002/hyp.6634, 2008.
- Krajcar Bronić, I., Barešić, J., Borković, D., Sironić, A., Lovrenčić Mikelić, I., and Vreća, P.: Long-term isotope records of precipitation in Zagreb, Croatia, *Water*, (in-review), water-669023, 2020.
- 440 Krajcar Bronić, I., Horvatinčić, N., and Obelić, B.: Two decades of environmental isotope records in Croatia: Reconstruction of the past and prediction of future levels, *Radiocarbon*, 40, 399-416, 1998.
- Krajcar Bronić, I., Horvatinčić, N., Srdoč, D., and Obelić, B.: Tritium concentration in the atmosphere over NW Yugoslavia. In: *Rare nuclear processes, Proceedings of the 14th Europhysics Conference on Nuclear Physics*, Povinec, P. (Ed.), World Scientific, 1992.
- 445 Kralik, M., Papesch, W., and Stichler, W.: Austrian Network of Isotopes in Precipitation (ANIP): Quality assurance and climatological phenomenon in one of the oldest and densest networks in the world, *Isotope Hydrology and Integrated Water Resources Management*, 2003. 146-149, 2003.
- Lal, D. and Peters, B.: Cosmic Ray Produced Radioactivity on the Earth. In: *Kosmische Strahlung II / Cosmic Rays II*, Sitte, K. (Ed.), Springer Berlin Heidelberg, Berlin, Heidelberg, 1967.
- 450 Li, Z., Jasechko, S., and Si, B.: Uncertainties in tritium mass balance models for groundwater recharge estimation, *Journal of Hydrology*, 571, 150-158, doi: <https://doi.org/10.1016/j.jhydrol.2019.01.030>, 2019.
- Lindau, R. and Venema, V.: A new method to study inhomogeneities in climate records: Brownian motion or random deviations?, *International Journal of Climatology*, 39, 4769-4783, doi: 10.1002/joc.6105, 2019.
- Little, R. J. and Rubin, D. B.: *Statistical analysis with missing data*. John Wiley & Sons, New York, 2002. 2002.
- 455 Lucas, L. L. and Unterwieser, M. P.: Comprehensive Review and Critical Evaluation of the Half-Life of Tritium, *J Res Natl Inst Stand Technol*, 105, 541-549, doi: 10.6028/jres.105.043, 2000.
- Matheron, G.: *Les Variables régionalisées et leur estimation: une application de la théorie des fonctions aléatoires aux sciences de la nature*, Masson et Cie Luisant-Chartres, impr. Durand, Paris, 1965.
- Meyer-Christoffer, A., Becker, A., Finger, P., Rudolf, B., Schneider, U., and Ziese, M.: GPCP Climatology Version 2011 at 0.5°: Monthly Land-Surface Precipitation Climatology for Every Month and the Total Year from Rain-Gauges built on GTS-based and Historic Data. Global Precipitation Climatology Centre (GPCP, <http://gpcc.dwd.de/>) at Deutscher Wetterdienst, 2011.
- Michel, R. L.: Residence times in river basins as determined by analysis of long-term tritium records, *Journal of Hydrology*, 130, 367-378, doi: [https://doi.org/10.1016/0022-1694\(92\)90117-E](https://doi.org/10.1016/0022-1694(92)90117-E), 1992.
- 465 Miljevića, N., Boreli-Zdravković, D., Golobočanin, D., Janković, M., Ogrinc, N., Holko, L., and Solomon, D.: Surface water-groundwater relationship in the velika morava catchment, Serbia. In: *Isotopic Age and Composition of Streamflow as Indicators of Groundwater Sustainability*, IAEA, Vienna, 1992.
- Ozyurt, N. N., Lutz, H. O., Hunjak, T., Mance, D., and Roller-Lutz, Z.: Characterization of the Gacka River basin karst aquifer (Croatia): Hydrochemistry, stable isotopes and tritium-based mean residence times, *Science of The Total Environment*, 487, 245-254, doi: <https://doi.org/10.1016/j.scitotenv.2014.04.018>, 2014.
- 470 Palcsu, L., Morgenstern, U., Sültenfuß, J., Koltai, G., László, E., Temovski, M., Major, Z., Nagy, J. T., Papp, L., Varlam, C., Faurescu, I., Túri, M., Rinyu, L., Czuppon, G., Bottyán, E., and Jull, A. J. T.: Modulation of Cosmogenic Tritium in Meteoric Precipitation by the 11-year Cycle of Solar Magnetic Field Activity, *Scientific Reports*, 8, 12813, doi: 10.1038/s41598-018-31208-9, 2018.
- 475 R Core Team: *R: A Language and Environment for Statistical Computing*. R Foundation for Statistical Computing, Vienna, Austria, 2019.
- Rozanski, K., Gonfiantini, R., and Araguas-Araguas, L.: Tritium in the global atmosphere: Distribution patterns and recent trends, *Journal of Physics G: Nuclear and Particle Physics*, 17, S523, 1991.



- 480 Stewart, M. K. and Morgenstern, U.: Importance of tritium-based transit times in hydrological systems, *Wiley Interdisciplinary Reviews: Water*, 3, 145-154, doi: 10.1002/wat2.1134, 2016.
- Sugahara, S., da Rocha, R. P., Ynoue, R. Y., and da Silveira, R. B.: Homogeneity assessment of a station climate series (1933–2005) in the Metropolitan Area of São Paulo: instruments change and urbanization effects, *Theor Appl Climatol*, 107, 361-374, doi: 10.1007/s00704-011-0485-x, 2012.
- 485 Surić, M., Roller-Lutz, Z., Mandić, M., Bronić, I. K., and Juračić, M.: Modern C, O, and H isotope composition of speleothem and dripwater from Modrič Cave, eastern Adriatic coast (Croatia), *International Journal of Speleology*, 39, 91-97, 2010.
- Szucs, P., Kompar, L., Palcsu, L., and Deak, J.: Estimation of the groundwater replenishment change at a Hungarian recharge area, *Carpathian Journal of Earth and Environmental Sciences*, 10, 227-236, 2015.
- Thatcher, L., Rubin, M., and Brown, G. F.: Dating Desert Ground Water, *Science*, 134, 105-106, doi: 10.1126/science.134.3472.105, 1961.
- 490 Vreča, P., Bronić, I. K., Horvatinčić, N., and Barešić, J.: Isotopic characteristics of precipitation in Slovenia and Croatia: Comparison of continental and maritime stations, *Journal of Hydrology*, 330, 457-469, doi: <https://doi.org/10.1016/j.jhydrol.2006.04.005>, 2006.
- Vreča, P., Bronić, I. K., and Leis, A.: Isotopic composition of precipitation at the station Portorož,, Slovenia–period 2007–2010, *Geologija*, 58, 233-246, 2015.
- 495 Vreča, P., Bronić, I. K., Leis, A., and Demšar, M.: Isotopic composition of precipitation at the station Ljubljana (Reaktor), Slovenia–period 2007–2010, *Geologija*, 57, 217-230, 2014.
- Vreča, P., Krajcar Bronić, I., Leis, A., and Brenčič, M.: Isotopic composition of precipitation in Ljubljana (Slovenia), *Geologija*, 51, 169, 2008.
- Webster, R. and Oliver, M. A.: *Geostatistics for Environmental Scientists*, John Wiley & Sons, Ltd, 2008.
- 500 Zhang, Y., Ye, S., and Wu, J.: A modified global model for predicting the tritium distribution in precipitation, 1960–2005, *Hydrological Processes*, 25, 2379-2392, doi: 10.1002/hyp.8001, 2011.
- Zuber, A., Michalczyk, Z., and Maloszewski, P.: Great tritium ages explain the occurrence of good-quality groundwater in a phreatic aquifer of an urban area, Lublin, Poland, *Hydrogeol J*, 9, 451-460, doi: 10.1007/s100400100149, 2001.
